# Supplementary material for: Single-chromosome dynamics reveals locus-dependent dynamics and chromosome territory orientation
Source: Oxford University Press journal article supplement (doi:10.1242/jcs.260137), 2023-01-31
Supplement: jcs260137supp.pdf [file jcs260137supp.pdf]

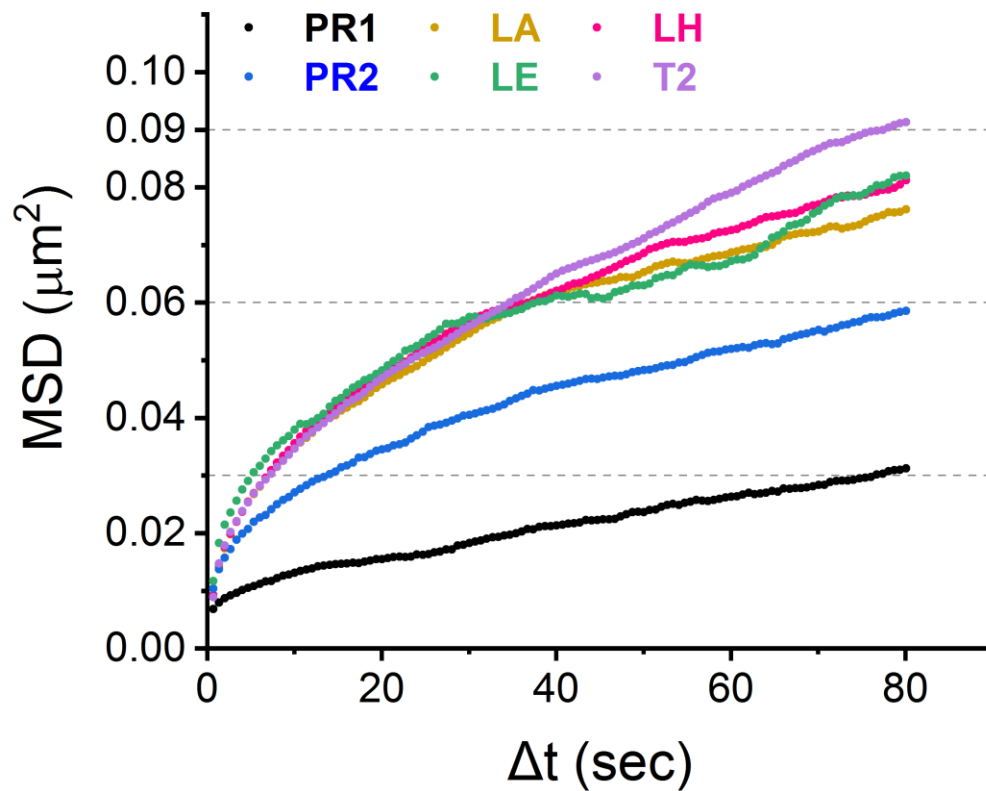

**Fig. S1. Power-law plot of MSD curves.** MSD curves of genomic loci ( $n = 28$  trajectories for PR1, 52 trajectories for PR2, 27 trajectories for LE, 77 trajectories for LH, 77 trajectories for LA, and 127 trajectories for T2).

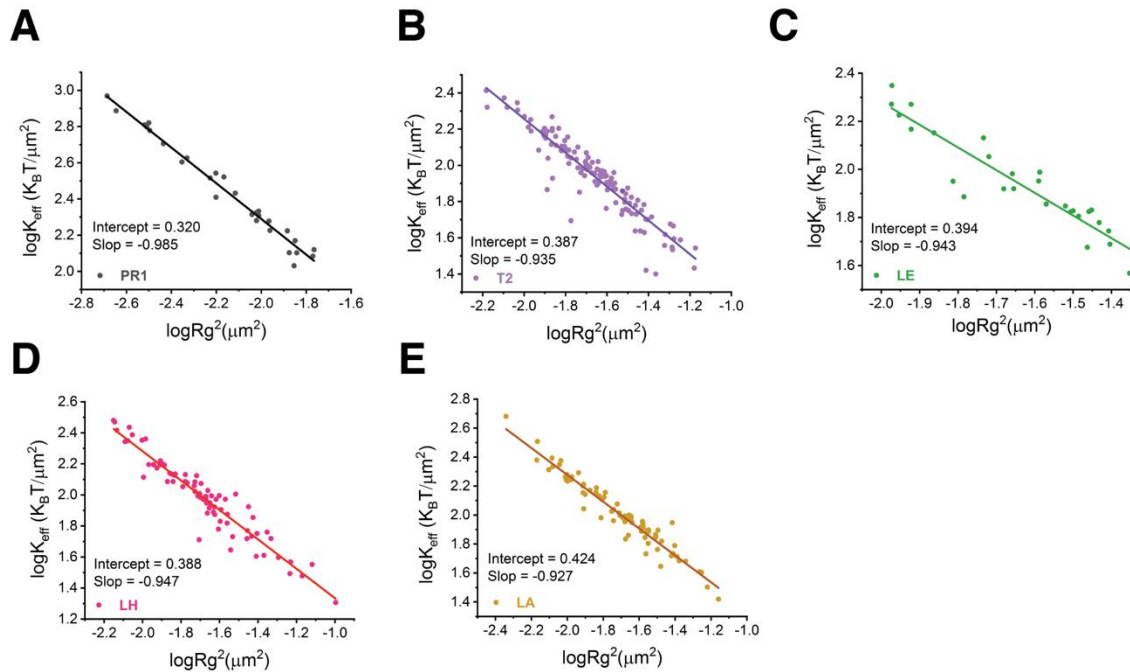

**Fig. S2. Effective force constraints locus dynamics.** (A)-(E) Log-log scatter plot of effective spring constants and loci territories for PR1, T2, LE, LH and LA. The data were fitted by linear regression (the solid lines) ( $n = 28$  trajectories for PR1, 52 trajectories for PR2, 27 trajectories for LE, 77 trajectories for LH, 77 trajectories for LA, and 127 trajectories for T2).

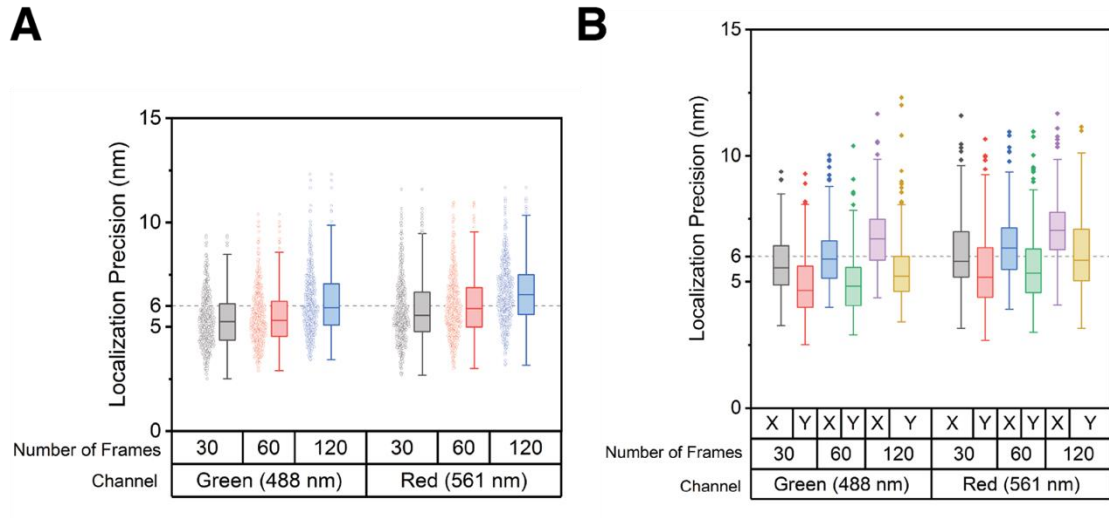

**Fig. S3. Localization precision in seconds.** (A) Localization precision of the green (488 nm excitation) and red (561 nm excitation) channels in 4 seconds (30 frames), 8 seconds (60 frames), and 16 seconds (120 frames) using 100 nm coverslip-immobilized beads ( $n = 220$ ). (B) Localization of the x and y axes within 16 seconds.

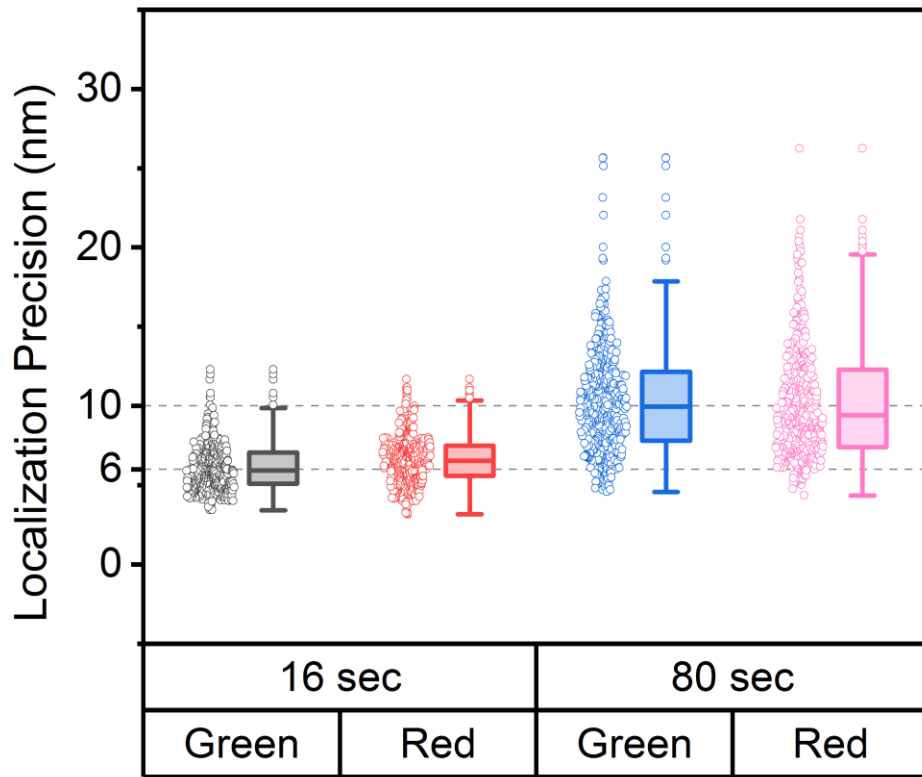

**Fig. S4. Localization precision over a minute.** Localization precision of the green (488 nm excitation) and red (561 nm excitation) channels in 16 seconds (120 frames,  $n = 220$ ) and 80 seconds (120 frames,  $n = 218$ ) using 100 nm coverslip-immobilized beads.

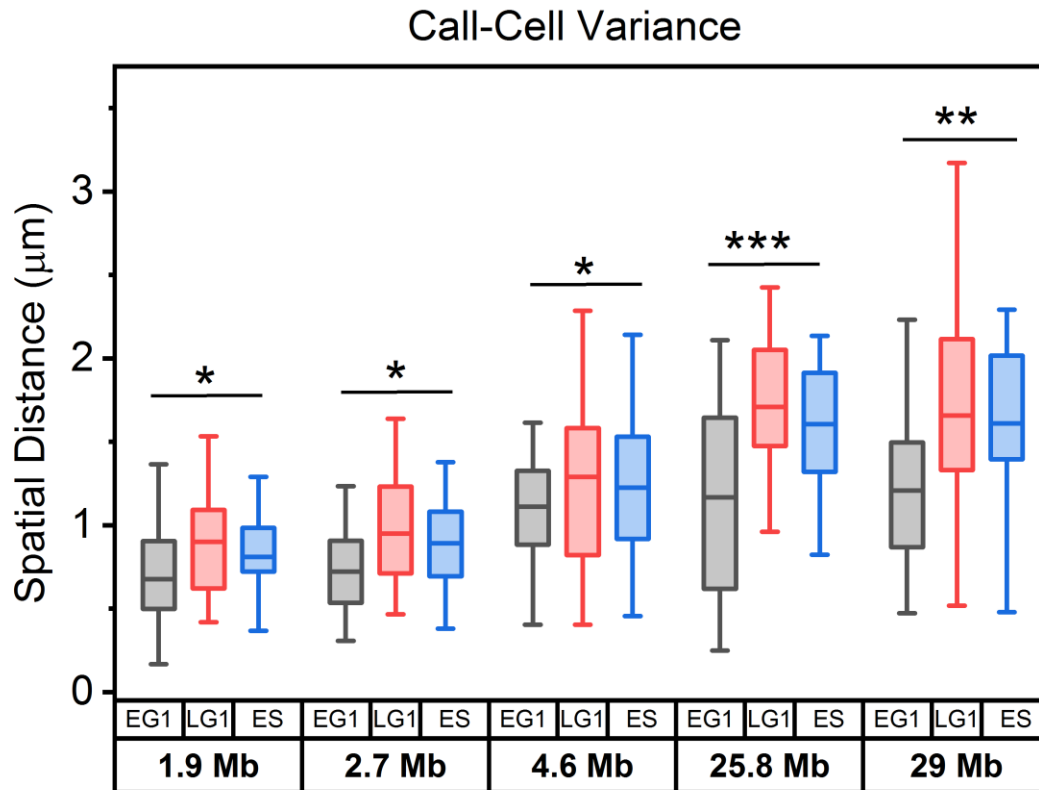

**Fig. S5. Cell-to-cell spatial distance distribution of pairs of loci during the cell cycle.** Boxplot of spatial distance distribution for each pair of loci at each cell cycle stage (from left to right,  $N_{\text{cell}} = 30$  (EG1), 27 (LG1), and 26 (ES) for 1.9 Mb locus pair LH/LA,  $N_{\text{cell}} = 34$  (EG1), 25 (LG1), and 26 (ES) for 2.7 Mb locus pair LA/T2,  $N_{\text{cell}} = 25$  (EG1), 29 (LG1), and 27 (ES) for 4.6 Mb locus pair LH/T2,  $N_{\text{cell}} = 27$  (EG1), 26 (LG1), and 28 (ES) for 25.8 Mb locus pair LE/T2,  $N_{\text{cell}} = 25$  (EG1), 29 (LG1), and 29 (ES) for 29 Mb locus pair LD/T2). Statistical significance for data from each pair of loci was tested by one-way ANOVA test. \*  $p < 0.05$ , \*\*  $p < 0.005$ , \*\*\*  $p < 0.0005$ .

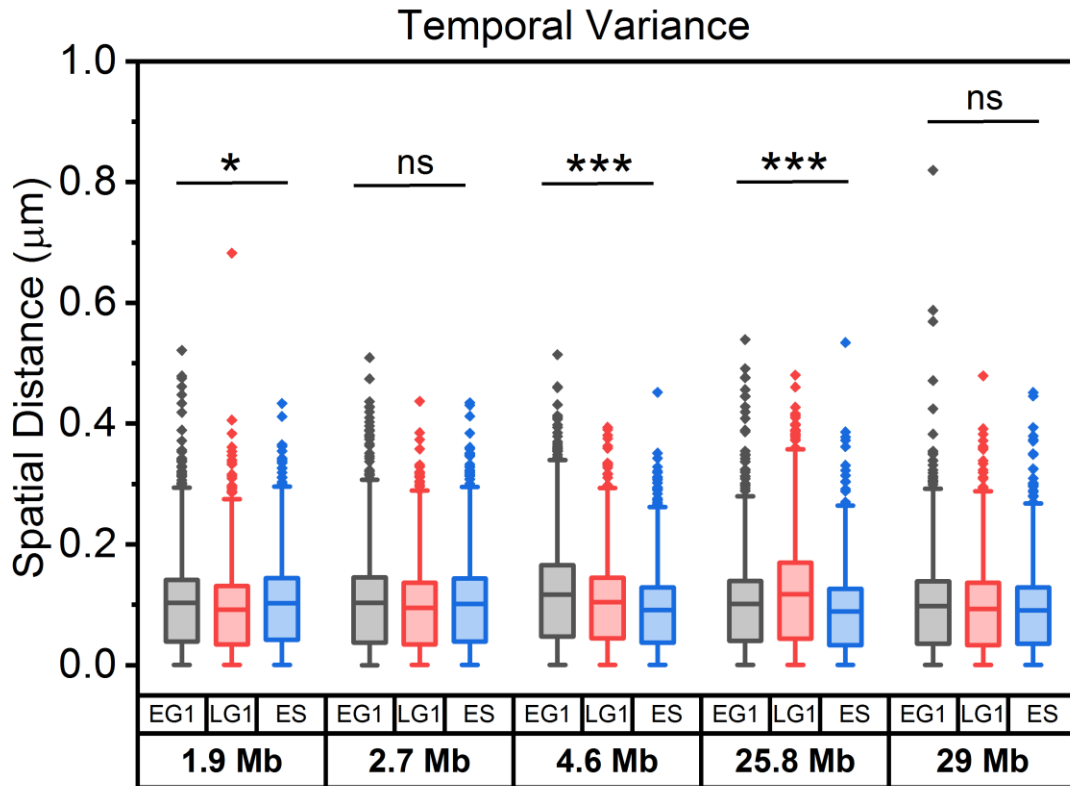

**Fig. S6. Temporal variation of the spatial distance of pairs of loci during the cell cycle.** Boxplots of temporal variation of spatial distance for each pair of loci at each cell cycle stage (from left to right,  $n = 900$  (EG1),  $810$  (LG1), and  $780$  (ES) for  $1.9$  Mb locus pair LH/LA,  $n = 1020$  (EG1),  $750$  (LG1), and  $780$  (ES) for  $2.7$  Mb locus pair LA/T2,  $n = 750$  (EG1),  $870$  (LG1), and  $810$  (ES) for  $4.6$  Mb locus pair LH/T2,  $n = 810$  (EG1),  $780$  (LG1), and  $840$  (ES) for  $25.8$  Mb locus pair LE/T2,  $n = 750$  (EG1),  $870$  (LG1), and  $870$  (ES) for  $29$  Mb locus pair LD/T2). Statistical significance for data from each pair of loci was tested by one-way ANOVA test. \*  $p < 0.05$ , \*\*  $p < 0.005$ , \*\*\*  $p < 0.0005$ .

**Table S1. Compaction exponents extracted from locus pairs**

| Genomic Locus Pair | N (cells) | Compaction Exponent ( $\delta$ ) | Cell Cycle Phase |
|--------------------|-----------|----------------------------------|------------------|
| 1.93 Mb LH/LA      | 36        | N/A                              | Asynchronous     |
| 2.69 Mb LA/T2      | 41        | N/A                              | Asynchronous     |
| 4.62 Mb LH/T2      | 41        | $0.40 \pm 0.02$                  | Asynchronous     |
| 25.82 Mb LE/T2     | 27        | $0.18 \pm 0.04$                  | Asynchronous     |
| 29.05 Mb PR2/T2    | 28        | $0.20 \pm 0.03$                  | Asynchronous     |
| 29.05 Mb PR2/T2    | 25        | $0.17 \pm 0.06$                  | EG1              |
| 29.05 Mb PR2/T2    | 29        | $0.21 \pm 0.03$                  | LG1              |
| 29.05 Mb PR2/T2    | 27        | $0.22 \pm 0.03$                  | ES               |

**Table S2. Biophysical parameters extracted from single locus trajectories**

| Genomic Locus | MSD Exponent ( $\beta$ )         | Radius ( $\mu\text{m}$ )         | $D_{app}$ ( $\mu\text{m}/\text{sec}^\beta$ ) | $N^\ddagger$ |
|---------------|----------------------------------|----------------------------------|----------------------------------------------|--------------|
| T2            | $(4.57 \pm 0.02) \times 10^{-1}$ | $(1.52 \pm 0.37) \times 10^{-1}$ | $(3.02 \pm 0.10) \times 10^{-3}$             | 127          |
| LA            | $(4.04 \pm 0.03) \times 10^{-1}$ | $(1.46 \pm 0.42) \times 10^{-1}$ | $(3.36 \pm 0.16) \times 10^{-3}$             | 77           |
| LH            | $(4.17 \pm 0.02) \times 10^{-1}$ | $(1.51 \pm 0.46) \times 10^{-1}$ | $(3.35 \pm 0.11) \times 10^{-3}$             | 77           |
| LE            | $(3.55 \pm 0.04) \times 10^{-1}$ | $(1.54 \pm 0.34) \times 10^{-1}$ | $(4.18 \pm 0.20) \times 10^{-3}$             | 27           |
| PR2           | $(3.59 \pm 0.01) \times 10^{-1}$ | $(1.28 \pm 0.32) \times 10^{-1}$ | $(2.98 \pm 0.05) \times 10^{-3}$             | 52           |
| PR1           | $(3.57 \pm 0.07) \times 10^{-1}$ | $(0.88 \pm 0.26) \times 10^{-1}$ | $(1.47 \pm 0.15) \times 10^{-3}$             | 28           |
| IDR1*         | $(3.41 \pm 0.08) \times 10^{-1}$ | $(1.33 \pm 0.51) \times 10^{-1}$ | $(5.31 \pm 0.12) \times 10^{-3}$             | 7            |
| IDR2*         | $(3.61 \pm 0.08) \times 10^{-1}$ | $(1.52 \pm 0.33) \times 10^{-1}$ | $(4.19 \pm 0.10) \times 10^{-3}$             | 19           |
| IDR3*         | $(3.64 \pm 0.03) \times 10^{-1}$ | $(1.48 \pm 0.36) \times 10^{-1}$ | $(4.86 \pm 0.05) \times 10^{-3}$             | 49           |
| TCF3*         | $(4.60 \pm 0.05) \times 10^{-1}$ | $(1.28 \pm 0.44) \times 10^{-1}$ | $(2.88 \pm 0.04) \times 10^{-3}$             | 12           |
| IDR4*         | $(4.41 \pm 0.07) \times 10^{-1}$ | $(1.58 \pm 0.52) \times 10^{-1}$ | $(4.16 \pm 0.08) \times 10^{-3}$             | 11           |

\*These data were adopted from (Ma et al., 2019).  $^\ddagger$ Number of trajectories

**Table S3. Biophysical parameters of transcription inhibition experiments**

| Genomic Locus  | DRB Treatment | MSD Exponent ( $\beta$ )         | Radius ( $\mu\text{m}$ )         | $D_{app}$ ( $\mu\text{m}/\text{sec}^\beta$ ) | $N^\ddagger$ |
|----------------|---------------|----------------------------------|----------------------------------|----------------------------------------------|--------------|
| <i>CYP4F12</i> | -             | $(3.47 \pm 0.02) \times 10^{-1}$ | $(1.52 \pm 0.37) \times 10^{-1}$ | $(3.09 \pm 0.06) \times 10^{-3}$             | 40           |
| <i>CYP4F12</i> | +             | $(3.31 \pm 0.02) \times 10^{-1}$ | $(1.28 \pm 0.32) \times 10^{-1}$ | $(3.59 \pm 0.07) \times 10^{-3}$             | 31           |
| <i>ZNF358</i>  | -             | $(3.28 \pm 0.02) \times 10^{-1}$ | $(0.88 \pm 0.26) \times 10^{-1}$ | $(2.26 \pm 0.07) \times 10^{-3}$             | 41           |
| <i>ZNF358</i>  | +             | $(3.42 \pm 0.03) \times 10^{-1}$ | $(1.58 \pm 0.52) \times 10^{-1}$ | $(4.02 \pm 0.11) \times 10^{-3}$             | 56           |

$^\ddagger$ Number of trajectories

**Table S4. Average effective spring and diffusion constants of single locus**

| <b>Genomic Locus</b> | <b><math>K_{\text{eff}}</math> (<math>K_B T/\mu\text{m}^2</math>)</b> | <b><math>D_{\text{eff}}</math> (<math>\mu\text{m}^2/\text{s}</math>)</b> |
|----------------------|-----------------------------------------------------------------------|--------------------------------------------------------------------------|
| T2                   | 97.35                                                                 | 0.00332                                                                  |
| LA                   | 118.13                                                                | 0.00333                                                                  |
| LH                   | 111.86                                                                | 0.00350                                                                  |
| LE                   | 97.73                                                                 | 0.00418                                                                  |
| PR2                  | 153.78                                                                | 0.00386                                                                  |
| PR1                  | 336.26                                                                | 0.00251                                                                  |

**Table S5. Genome coordinate of human chromosome-19-specific repeats**

|   | <b>Label</b>   | <b>Start</b> | <b>End</b> |
|---|----------------|--------------|------------|
| 1 | PR1            | 21049341     | 21099156   |
| 2 | PR2            | 30002646     | 30005739   |
| 3 | LE             | 33230168     | 33231522   |
| 4 | LH             | 54422568     | 54428888   |
| 5 | LA             | 56361126     | 56363117   |
| 6 | T2             | 59050388     | 59054262   |
| 7 | <i>CYP4F12</i> | 16042336     | 16044890   |
| 8 | <i>ZNF358</i>  | 7515015      | 7516031    |



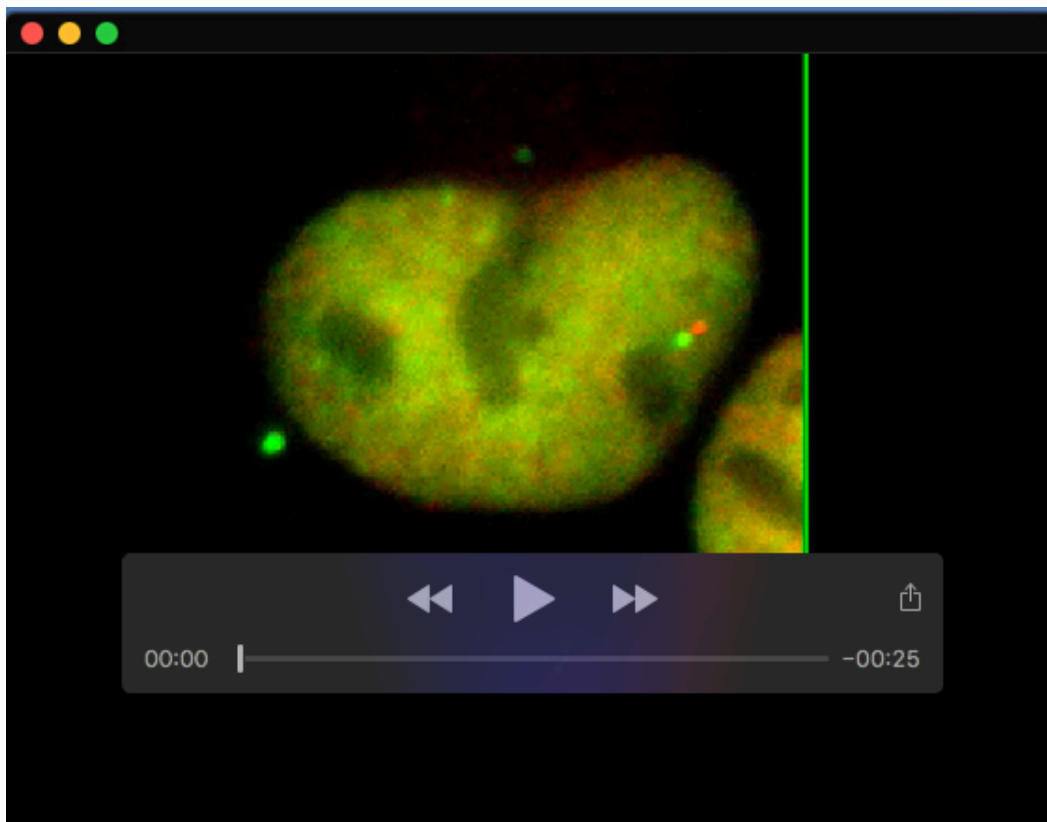

**Movie 1.** This movie shows a typical movement of the locus pair LH/T2 in the U2OS cell nucleus recorded over 80 seconds (120 image frames). LH is labeled in red by Halo tag-JF549 and T2 is labeled by GFP. The movie play rate is 30 Hz. The trajectories of loci in this movie are shown in Figure 3A.

## References

Ma, H., Tu, L. C., Chung, Y. C., Naseri, A., Grunwald, D., Zhang, S. and Pederson, T. (2019). Cell cycle- and genomic distance-dependent dynamics of a discrete chromosomal region. *J Cell Biol* **218**, 1467-1477.
